# Supplementary material for: Comparative Analysis of Volatile Compounds in Tieguanyin with Different Types Based on HS–SPME–GC–MS
Source: MDPI journal article supplement (doi:10.3390/foods11111530), 2022-05-24
Supplement: s1 [file s1]

|                                  |      | Numbers |
|----------------------------------|------|---------|
| Different degree of fermentation | LF-T | 5       |
|                                  | HF-T | 5       |
| Different grades                 | HF-F | 5       |
|                                  |      |         |
| Different varieties              | TGY  | 5       |
|                                  | HD   | 2       |
|                                  | BYQL | 1       |
|                                  | ZPSX | 2       |

**Figure S1.** Information on the tea samples. LF-T: special-grade *Tieguanyin* with low fermentation, HF-T: special-grade *Tieguanyin* with heavy-fermentation, HF-F: first-grade *Tieguanyin* with heavy-fermentation, TGY: *Tieguanyin*, HD: *Huangdan*, BYQL: *Baiyaqilan*, and ZPSX: *Zhangpinshuixian*.
